# Supplementary material for: Dissociating the Role of the DLPFC and VLPFC in Cognitive Control in Depression: A Combined HD-tDCS and fNIRS Study
Source: Research Square preprint supplement (doi:10.21203/rs.3.rs-7179811/v1), 2025-07-30
Supplement: Supplementary file 1 [file 2d8cfd30c5fdd5e18ff8f9af.docx]

**SUPPLEMENTARY MATERIAL**

**Model diagnostics**


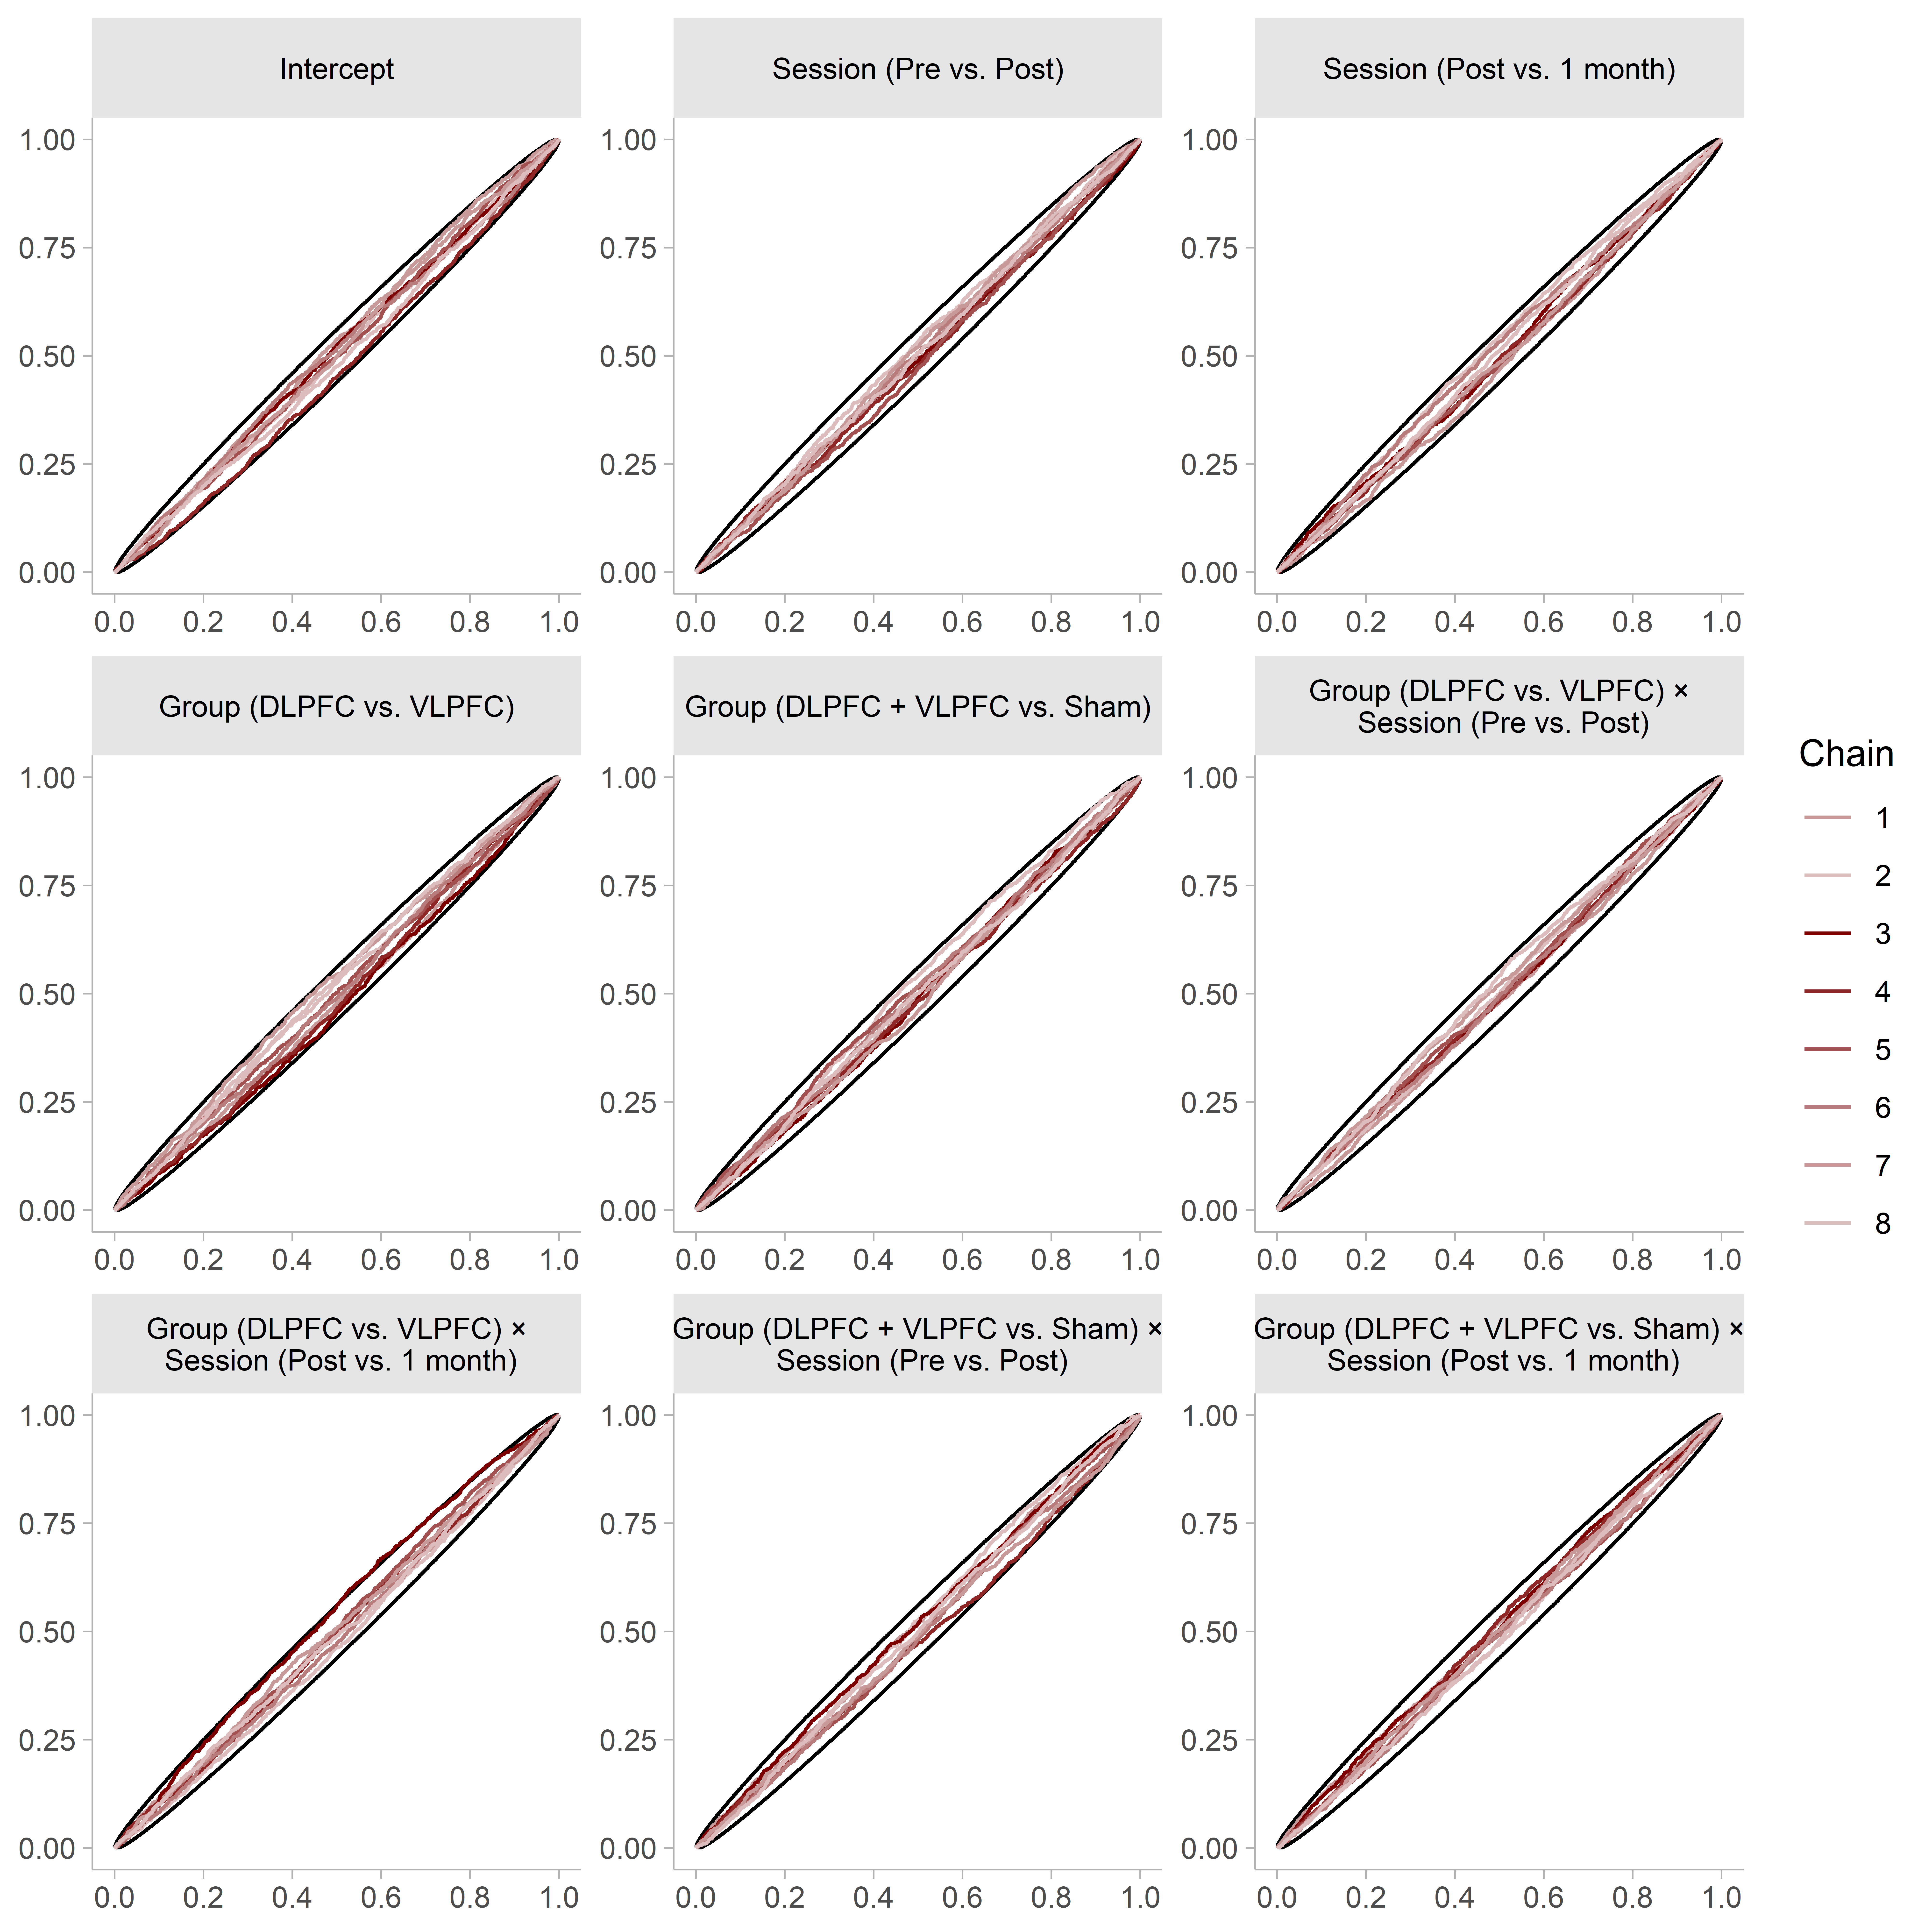


**Figure 8**. Empirical cumulative distribution function (ECDF) of the true-value posterior quantiles of the fixed regression coefficients of the model. Under good calibration, the ECDF of each chain (red) is expected to lie within the 99% confidence envelope (black).

**Connectivity circle**

|   **Figure 9**. Average connectivity circle for each group and session. Lines indicate above-threshold degree of connectivity. Channels are displayed in a circular fashion, with channels in the left (darker grey) and right (lighter grey) hemispheres on the corresponding side of the circle, and with more anterior channels on the top and more posterior channels on the bottom. |
| --- |
